# Supplementary material for: A Comparison of IgG Index and Oligoclonal Band in the Cerebrospinal Fluid for Differentiating between RRMS and NMOSD
Source: MDPI journal article supplement (doi:10.3390/brainsci12010069), 2021-12-31
Supplement: s1 [file s1]

**Supplementary Table S1.** Comparison of the IgG index and CSF-OCB for differentiating between RRMS patients with more than one clinical attack and patients suffering from AQP4-Ab NMOSD based on the stratification of the onset age.

| Onset age    | Methods                | Results | Diagnosis |       | $\kappa$ | $p$       |
|--------------|------------------------|---------|-----------|-------|----------|-----------|
|              |                        |         | RRMS      | NMOSD |          |           |
| $\leq 38.5y$ | CSF-OCB                | –       | 12        | 2     | 0.027    | $> 0.99$  |
|              |                        | +       | 15        | 2     |          |           |
| $> 38.5y$    |                        | –       | 6         | 18    | 0.286    | 0.121     |
|              |                        | +       | 5         | 4     |          |           |
| Total        |                        | –       | 18        | 20    | 0.275    | 0.022     |
|              |                        | +       | 20        | 6     |          |           |
| $\leq 38.5y$ | IgG index <sup>#</sup> | – *     | 13        | 12    | 0.343    | 0.009     |
|              |                        | +       | 33        | 6     |          |           |
| $> 38.5y$    |                        | –       | 2         | 46    | 0.339    | $< 0.001$ |
|              |                        | +       | 15        | 26    |          |           |
| Total        |                        | –       | 15        | 58    | 0.391    | $< 0.001$ |
|              |                        | +       | 48        | 32    |          |           |

<sup>#</sup> The optimal cutoff values for IgG index in differentiating between the two diseases were 0.67 when the onset age was  $\leq 38.5y$  and 0.75 when the onset age was  $> 38.5y$ , respectively.

\* A “–” refers to an IgG index lower than the defined threshold, while a “+” indicates a value greater than the defined threshold.

**Abbreviations:** RRMS = relapsing–remitting multiple sclerosis; NMOSD = neuromyelitis optica spectrum disorder; CSF-OCB = oligoclonal band in the cerebrospinal fluid.

**Supplementary Table S2.** Comparison of the IgG index and CSF-OCB for differentiating between patients with RRMS and AQP4-Ab NMOSD based on the stratification of the age at LP.

| Age at LP | Methods   | Results | Diagnosis |       | $\kappa$ | $p$     | Sen   | Spe   | PPV   | NPV   | PA    |
|-----------|-----------|---------|-----------|-------|----------|---------|-------|-------|-------|-------|-------|
|           |           |         | RRMS      | NMOSD |          |         |       |       |       |       |       |
| ≤44.5y    | CSF-OCB   | −       | 13        | 8     | 0.32     | 0.014   | 0.705 | 0.727 | 0.912 | 0.381 | 0.709 |
|           |           | +       | 31        | 3     |          |         |       |       |       |       |       |
| >44.5y    |           | −       | 5         | 12    | 0.39     | 0.057   | 0.583 | 0.80  | 0.70  | 0.706 | 0.704 |
|           |           | +       | 7         | 3     |          |         |       |       |       |       |       |
| Total     |           | −       | 18        | 20    | 0.40     | < 0.001 | 0.679 | 0.769 | 0.864 | 0.526 | 0.707 |
|           |           | +       | 38        | 6     |          |         |       |       |       |       |       |
| ≤44.5y    | IgG index | −       | 14        | 23    | 0.47     | < 0.001 | 0.785 | 0.697 | 0.836 | 0.622 | 0.755 |
|           |           | +       | 51        | 10    |          |         |       |       |       |       |       |
| >44.5y    |           | −       | 4         | 47    | 0.51     | < 0.001 | 0.75  | 0.825 | 0.545 | 0.922 | 0.808 |
|           |           | +       | 12        | 10    |          |         |       |       |       |       |       |
| Total     |           | −       | 18        | 70    | 0.56     | < 0.001 | 0.778 | 0.778 | 0.759 | 0.795 | 0.778 |
|           |           | +       | 63        | 20    |          |         |       |       |       |       |       |

**Abbreviations:** RRMS = relapsing–remitting multiple sclerosis; NMOSD = neuromyelitis optica spectrum disorder; CSF-OCB = oligoclonal band in the cerebrospinal fluid; Sen =

sensitivity; Spe = specificity; PPV = positive predictive value; NPV = negative predictive value; PA = predictive accuracy.

**Supplementary Table S3.** The agreement with diagnosis achieved by different methods.

|                               | Onset age | $\kappa$ | $p$     |
|-------------------------------|-----------|----------|---------|
| Reiber's hyperbolic function* | ≤38.5y    | 0.38     | 0.001   |
|                               | >38.5y    | 0.32     | < 0.001 |
|                               | Total     | 0.40     | < 0.001 |
| IgG index with cutoff of 0.7  | ≤38.5y    | 0.36     | 0.002   |
|                               | >38.5y    | 0.33     | < 0.001 |
|                               | Total     | 0.39     | < 0.001 |
| Our scheme                    | ≤38.5y    | 0.40     | < 0.001 |
|                               | >38.5y    | 0.49     | < 0.001 |
|                               | Total     | 0.56     | < 0.001 |

\* Based on the calculation by Reiber's hyperbolic function, the upper limit of quantitative intrathecal IgG synthesis is determined by the following equation:

$$Q_{lim}(\text{IgG}) = 0.93\sqrt{Q_{alb}^2 + 6 \times 10^{-6}} - 1.7 \times 10^{-3}$$

Therefore, the presence of intrathecal IgG synthesis was defined as the QIgG greater than  $Q_{lim}(\text{IgG})$ .

**Supplementary Table S4.** Spearman's bivariate correlation analysis between NMOSD and RRMS.

| Diagnosis | Variables            | Onset age | Age at LP | QIgG    | Qalb   | IgG index |
|-----------|----------------------|-----------|-----------|---------|--------|-----------|
| NMOSD     | Age at LP            | 0.938**   |           |         |        |           |
|           | QIgG                 | 0.303**   | 0.366**   |         |        |           |
|           | Qalb                 | 0.294**   | 0.335**   | 0.912** |        |           |
|           | IgG index            | 0.198#    | 0.252*    | 0.514** | 0.170  |           |
|           | CSF-OCB <sup>▲</sup> | -0.079    | -0.061    | 0.475*  | 0.158  | 0.730**   |
| RRMS      | Age at LP            | 0.829**   |           |         |        |           |
|           | QIgG                 | 0.366**   | 0.364**   |         |        |           |
|           | Qalb                 | 0.390**   | 0.428**   | 0.768** |        |           |
|           | IgG index            | 0.045     | -0.008    | 0.562** | -0.022 |           |
|           | CSF-OCB <sup>Δ</sup> | -0.161    | -0.155    | 0.293*  | 0.019  | 0.532**   |

\*\* $p < 0.01$ , \*  $p < 0.05$ .

#  $p = 0.062$

▲Data from 26 patients with AQP4-Ab NMOSD were available.

ΔData from 56 patients with RRMS were available.

**Abbreviations:** NMOSD = neuromyelitis optica spectrum disorder; RRMS = relapsing–remitting multiple sclerosis; LP = lumbar puncture; CSF = cerebrospinal fluid; QIgG = quotient of IgG in CSF and IgG in serum; Qalb = quotient of albumin in CSF and albumin in serum; CSF-OCB = oligoclonal band in CSF.

**Supplementary Table S5.** Partial correlation analyses between Qalb and diagnosis while controlling the onset age or age at LP.

| Control Variables |           |                           | Qalb   |
|-------------------|-----------|---------------------------|--------|
| Onset age         | Diagnosis | Correlation coefficient * | 0.013  |
|                   |           | <i>p</i>                  | 0.864  |
| Age at LP         | Diagnosis | Correlation coefficient   | -0.002 |
|                   |           | <i>p</i>                  | 0.983  |

\* A positive value means the variable was associated with NMOSD while a negative one indicates that the variable was correlated with RRMS.

**Abbreviations:** LP = lumbar puncture; Qalb = quotient of albumin in CSF and albumin in serum.
